# Supplementary material
Source: PubMed Central journal article supplement (PMC8436048)
Supplement: NIHMS1591703-supplement-316365_Online.pdf [file NIHMS1591703-supplement-316365_Online.pdf]

## **Supplementary Figure Legend**

**Supplementary Figure.** The relationship between allele frequency and effect size in common diseases such as AF. KCNQ1, LMNA, and SCN5A are examples of 3 genes discovered by linkage analysis to possess monogenic causes of AF. 1q21, 4q25, and 16q22 are AF susceptibility loci discovered by GWAS which possess a small individual effect size ( $OR < 2$ ), but combine with thousands of other common variants across the genome to contribute greater effect for development of AF.

**Supplementary Table I. Evaluation of AF in an inherited arrhythmia clinic focuses on historical features to suggest overlapping cardiomyopathy and arrhythmia syndromes.** SOB- shortness of breath. DOE- dyspnea on exertion. VT/VF- ventricular tachycardia/ventricular fibrillation. ICD- implantable cardioverter defibrillator.

**Supplementary Table II. Genetic loci associated with AF discovered using linkage analysis in families with AF.** AV- atrioventricular. VT- ventricular tachycardia. PMID- Pubmed reference identification number.<sup>67, 69, 72, 146-149</sup>

| <b>Gene</b>   | <b>Overlapping Syndromes</b>    | <b>Year</b> | <b>1<sup>st</sup> Reference</b> |
|---------------|---------------------------------|-------------|---------------------------------|
| <i>LMNA</i>   | Sinus/AV nodal dysfunction, DCM | 1999        | 69                              |
| <i>KCNQ1</i>  | None                            | 2003        | 146                             |
| <i>NUP155</i> | VT                              | 2004        | 147                             |
| <i>SCN5A</i>  | DCM                             | 2005        | 148                             |
| <i>NPPA</i>   | None                            | 2008        | 149                             |
| <i>MYL4</i>   | none                            | 2016        | 67                              |
| <i>GATA6</i>  | Septal defects                  | 2017        | 72                              |

| Historical Feature                                                                | Suggests                                                             |
|-----------------------------------------------------------------------------------|----------------------------------------------------------------------|
| <i>History of Present Illness/Review of Systems</i>                               |                                                                      |
| Palpitations, fatigue, SOB/DOE,                                                   | AF-related symptoms                                                  |
| Syncope                                                                           | Sinus node dysfunction/Conduction disease<br>Ventricular arrhythmias |
| Orthopnea, edema, SOB/DOE                                                         | Congestive heart failure                                             |
| <i>Past Medical History/Family Medical History</i>                                |                                                                      |
| VT/VF<br>ICD<br>Sudden unexplained death syndrome<br>Sudden infant death syndrome | Inherited channelopathy or cardiomyopathy with VT/VF                 |
| Pacemaker                                                                         | Inherited channelopathy or cardiomyopathy with conduction disease    |
| Seizures                                                                          | Inherited channelopathy                                              |
| Cardiomyopathy, heart failure                                                     | Inherited cardiomyopathy                                             |
| Skeletal Muscle Weakness                                                          | Neuromuscular Disorder                                               |
| Congenital deafness                                                               | <u>Jervell-Lange Neilsen Syndrome</u>                                |
| Cryptogenic stroke                                                                | Embolic stroke due to AF (possibly undiagnosed)                      |

large

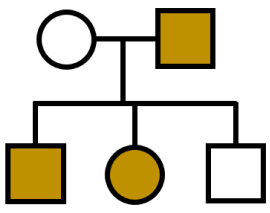

e.g. Pathogenic rare variants discovered in families or by sequencing large populations (*KCNQ1*, *SCN5A*, *TTN*)

Effect size

small

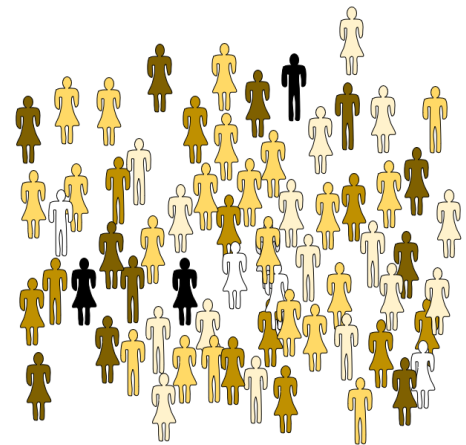

e.g. AF susceptibility loci discovered by GWAS (1q21, 4q25, 16q22)

rare (<0.01%)

Allele frequency

Common (>5%)
